# Supplementary material for: Anisotropic hybrid particles based on electrohydrodynamic co-jetting of nanoparticle suspensions
Source: Royal Society of Chemistry journal article supplement (doi:10.1039/c0cp00264j), 2010-01-01
Supplement: c0cp00264j.pdf [file c0cp00264j.pdf]

## Electronic Supplementary Information

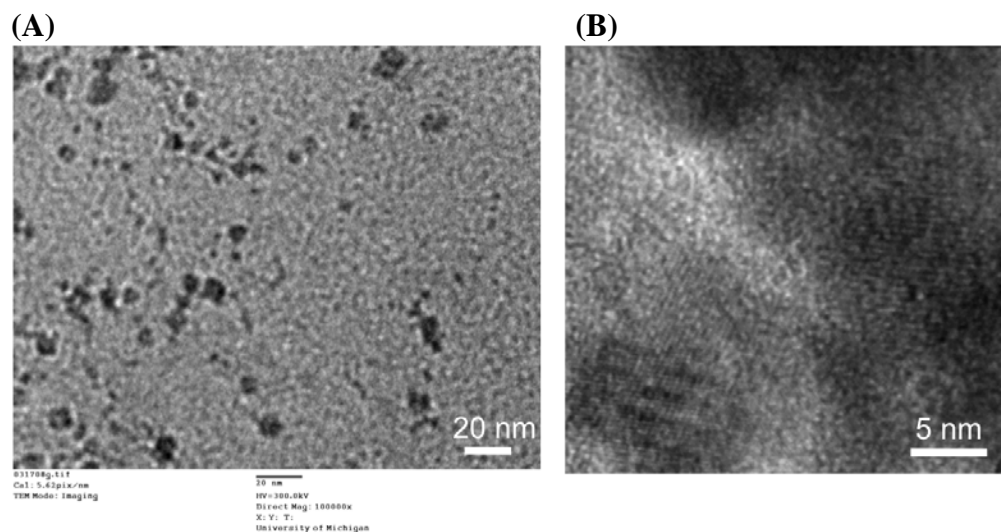

**Figure S1.** TEM image of the magnetite shows an average size of 10 nm in diameter (A) and a magnified view showing the crystalline magnetite (B).

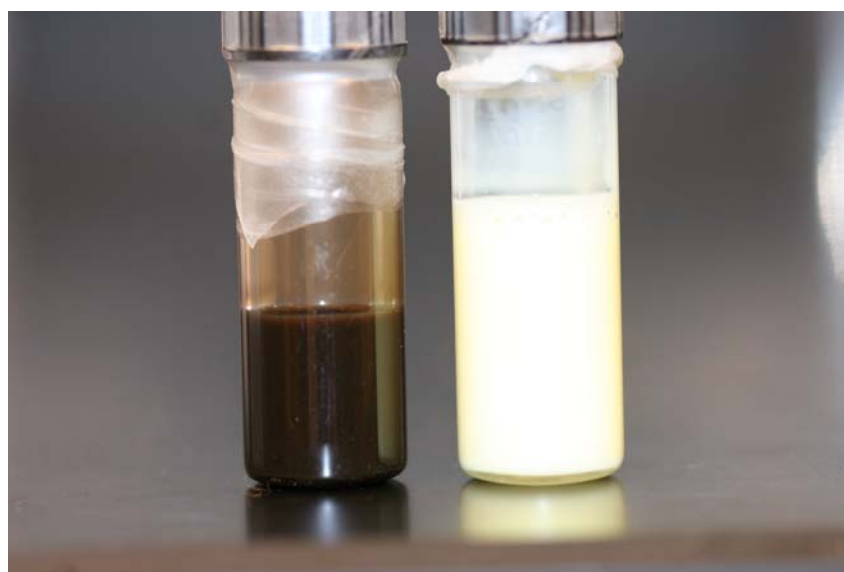

**Figure S2.** A typical image of two jetting solutions in vials where the dark one has p(AAm-co-AA) (5 wt/v %), PAA-stabilized magnetite (2.2 wt/v %), and rhodamine B isothiocyanate-dextran (0.5 wt/v %) in ethylene glycol, while the white solution has p(AAm-co-AA) (5 wt/v %), PAA-stabilized TiO<sub>2</sub> (2.2 wt/v %), and FITC-dextran (0.5 wt/v %) in ethylene glycol.

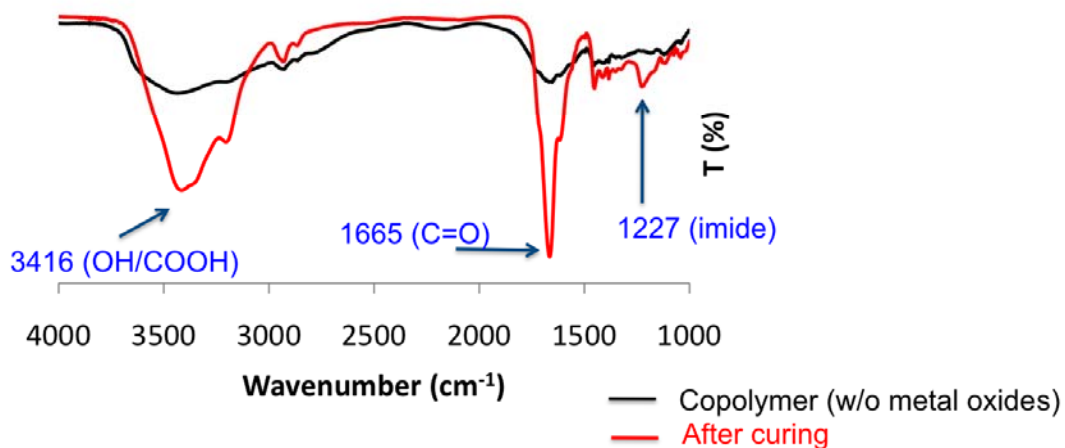

**Figure S3.** The IR spectrum of hybrid particles prepared by the EHD co-jetting after thermal crosslinking (red spectrum) compared to the IR spectrum of the neat polymer.

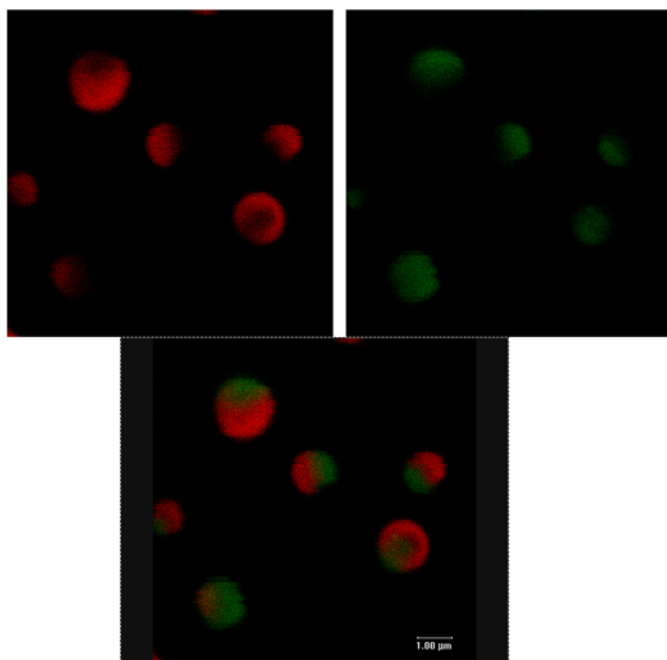

**Figure S4.** The CLSM images of the particles after storage in DI water for one week at room temperature.

(A)

(B)

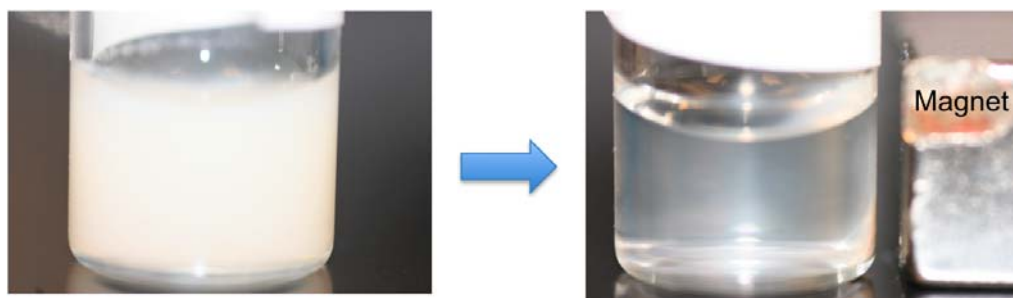

**Figure S5.** (A) The bicompartmental particles are suspended in DI water. (B) The suspension solution becomes clear after an external magnet has introduced.
